# Supplementary material for: CHRNA5 and CHRNA3 polymorphism and lung cancer susceptibility in Palestinian population
Source: PubMed Central journal article supplement (PMC5879790; doi:10.1186/s13104-018-3310-0), 2018-04-02
Supplement: 13104_2018_3310_MOESM1_ESM.pdf [file 13104_2018_3310_MOESM1_ESM.pdf]

**Additional file 1: List of AS-primers for each SNP**

| Gene<br>SNP                                | Sequance (5'→3') <sup>‡</sup>          | Description            | Amplicon Size<br>(bp) |
|--------------------------------------------|----------------------------------------|------------------------|-----------------------|
| <i>CHRNA5</i><br>(c.1192G>A)<br>rs16969968 | CTTGTAATGTAGCGAATAGAAg <u><b>C</b></u> | Wild-type<br>antisense | 215                   |
|                                            | CTTGTAATGTAGCGAATAGAAg <u><b>T</b></u> | Mutant<br>antisense    |                       |
|                                            | CGCTATCAACATTCATCATC                   | Common<br>sense        |                       |
| <i>CHRNA3</i><br>(c.65C>T)<br>rs1051730    | TTGTACTIONGATGTCGTGTTg <u><b>G</b></u> | Wild-type<br>antisense | 150                   |
|                                            | TTGTACTIONGATGTCGTGTTg <u><b>A</b></u> | Mutant<br>antisense    |                       |
|                                            | ACTGTACCATGAAGTTCGGT                   | Common<br>sense        |                       |

<sup>‡</sup> the underlined bold letter indicates the wild-type and variant specific nucleotide. The lowercase letter indicats intentionally introduced mismatches at the penultimate base.
