# Supplementary material for: CHRNA5 and CHRNA3 polymorphism and lung cancer susceptibility in Palestinian population
Source: PubMed Central journal article supplement (PMC5879790; doi:10.1186/s13104-018-3310-0), 2018-04-02
Supplement: 13104_2018_3310_MOESM2_ESM.pdf [file 13104_2018_3310_MOESM2_ESM.pdf]

**Additional file 2: Genotype distribution of the SNP rs16969968 and the SNP rs1051730 among cases and controls.**

| <b>CHRNA5 (c.1192G&gt;A) rs16969968</b>  |                        |                           |                         |                |
|------------------------------------------|------------------------|---------------------------|-------------------------|----------------|
| <b>Genotype</b>                          | <b>Case<br/>(n=30)</b> | <b>Control<br/>(n=60)</b> | <b>Total<br/>(n=90)</b> | <b>P-value</b> |
| <b>GG</b>                                | 12 (40%)               | 41 (68.3%)                | 53 (58.9%)              | 0.022          |
| <b>GA</b>                                | 14 (46.7%)             | 17 (28.3%)                | 31 (34.4%)              |                |
| <b>AA</b>                                | 4 (13.3%)              | 2 (3.4%)                  | 6 (6.7)                 |                |
| <b>Frequency of the minor allele (A)</b> | 36.7%                  | 17.5%                     | 23.9%                   |                |
| <b>CHRNA3 (c.65C&gt;T) rs1051730</b>     |                        |                           |                         |                |
| <b>Genotype</b>                          | <b>Case<br/>(n=30)</b> | <b>Control<br/>(n=60)</b> | <b>Total<br/>(n=90)</b> | <b>P-value</b> |
| <b>CC</b>                                | 9 (30.0%)              | 34 (56.7%)                | 43 (47.8%)              | 0.001          |
| <b>CT</b>                                | 14 (46.7%)             | 25 (41.7%)                | 39 (43.3%)              |                |
| <b>TT</b>                                | 7 (23.3%)              | 1 (1.6%)                  | 8 (8.9%)                |                |
| <b>Frequency of the minor allele (T)</b> | 46.7%                  | 22.5%                     | 30.5%                   |                |
