# Supplementary material for: CHRNA5 and CHRNA3 polymorphism and lung cancer susceptibility in Palestinian population
Source: PubMed Central journal article supplement (PMC5879790; doi:10.1186/s13104-018-3310-0), 2018-04-02
Supplement: 13104_2018_3310_MOESM3_ESM.pdf [file 13104_2018_3310_MOESM3_ESM.pdf]

**Additional file 3: rs16969968 and rs1051730 genotypes and risk of lung cancer.**

| <b>Genotype</b>                                          |                    | <b>OR</b> | <b>95%CI</b> | <b>P-value</b> |
|----------------------------------------------------------|--------------------|-----------|--------------|----------------|
| <b><i>CHRNA5</i></b><br><b>(c.1192G&gt;A) rs16969968</b> | GA/AA <u>VS</u> GG | 3.23      | 1.30-8.05    | 0.010          |
|                                                          | GA <u>VS</u> GG    | 2.81      | 1.08-7.32    | 0.029          |
|                                                          | AA <u>VS</u> GG    | 6.83      | 1.11-41.97   | 0.041          |
| <b><i>CHRNA3</i></b><br><b>(c.65C&gt;T) rs1051730</b>    | CT/TT <u>VS</u> CC | 3.05      | 1.20–7.75    | 0.015          |
|                                                          | CT <u>VS</u> CC    | 2.20      | 0.82–5.91    | 0.113          |
|                                                          | TT <u>VS</u> CC    | 13.22     | 2.33–74.9    | 0.001          |
