# Supplementary material for: CHRNA5 and CHRNA3 polymorphism and lung cancer susceptibility in Palestinian population
Source: PubMed Central journal article supplement (PMC5879790; doi:10.1186/s13104-018-3310-0), 2018-04-02
Supplement: 13104_2018_3310_MOESM4_ESM.pdf [file 13104_2018_3310_MOESM4_ESM.pdf]

**Additional file 4: Cigarettes consumption in smoker cases VS smoker controls.**

|                                 |               | <b>Smoker Case</b> | <b>Smoker Control</b> | <b><i>P</i>-value</b> |
|---------------------------------|---------------|--------------------|-----------------------|-----------------------|
| <b>Number of Cigarettes/day</b> | Mean $\pm$ SD | 30.2 $\pm$ 13.2    | 31.0 $\pm$ 12.5       | 0.823                 |
| <b>Duration (Years)</b>         | Mean $\pm$ SD | 39.04 $\pm$ 12.7   | 28.0 $\pm$ 10.5       | 0.001                 |
