# Supplementary material for: CHRNA5 and CHRNA3 polymorphism and lung cancer susceptibility in Palestinian population
Source: PubMed Central journal article supplement (PMC5879790; doi:10.1186/s13104-018-3310-0), 2018-04-02
Supplement: 13104_2018_3310_MOESM5_ESM.pdf [file 13104_2018_3310_MOESM5_ESM.pdf]

**Additional file 5: Genotype and minor allele distribution among smoker cases and controls.**

| <b>Genotype</b>                         |    | <b>Smoker Case</b> | <b>Smoker Control</b> | <b>P-value</b> |
|-----------------------------------------|----|--------------------|-----------------------|----------------|
| <i>CHRNA5</i><br>(c.1192G>A) rs16969968 | GG | 10 (38.5%)         | 18 (60%)              | 0.272          |
|                                         | GA | 13 (50%)           | 10 (33.3%)            |                |
|                                         | AA | 3 (11.5%)          | 2 (6.7%)              |                |
| Frequency of the minor allele (A)       |    | 36.7%              | 23.3%                 |                |
| <i>CHRNA3</i><br>(c.65C>T) rs1051730    | CC | 7 (26.9%)          | 14 (46.7%)            | 0.015          |
|                                         | CT | 13 (50%)           | 16 (53.3%)            |                |
|                                         | TT | 6 (23.1%)          | 0                     |                |
| Frequency of the minor allele (T)       |    | 41.7%              | 26.7%                 |                |
